# Supplementary material for: On the limitations in assessing stability of oxygen evolution catalysts using aqueous model electrochemical cells
Source: PubMed Central journal article supplement (PMC8044118; doi:10.1038/s41467-021-22296-9), 2021-04-13
Supplement: 41467_2021_22296_MOESM1_ESM.pdf [file 41467_2021_22296_MOESM1_ESM.pdf]

1  
2  
3  
4  
5  
6  
7  
8  
9  
10  
11  
12  
13  
14  
15  
16  
17  
18  
19  
20  
21  
22  
23  
24  
25  
26  
27  
28

Supplementary information

# On the limitations in assessing the stability of oxygen evolution catalysts using aqueous model electrochemical cells

Julius Knöppel<sup>a,b,\*</sup>, Maximilian Möckl<sup>c</sup>, Daniel Escalera-López<sup>a</sup>, Kevin Stojanowski<sup>a,b</sup>, Markus Bierling<sup>a,b</sup>, Thomas Böhm<sup>a,b</sup>, Simon Thiele<sup>a,b</sup>, Matthias Rzepka<sup>c</sup> and Serhiy Cherevko<sup>a,\*</sup>

<sup>a</sup> Forschungszentrum Jülich GmbH, Helmholtz Institute Erlangen-Nürnberg for Renewable Energy (IEK-11), Forschungszentrum Jülich, Egerlandstr. 3, 91058 Erlangen, Germany

<sup>b</sup> Department of Chemical and Biological Engineering, Friedrich-Alexander-Universität Erlangen-Nürnberg, Egerlandstr. 3, 91058 Erlangen, Germany

<sup>c</sup> ZAE Bayern, Electrochemical Energy Storage, Walther-Meißner-Str. 6, 85748, Garching, Germany

[j.knoeppel@fz-juelich.de](mailto:j.knoeppel@fz-juelich.de);

[s.cherevko@fz-juelich.de](mailto:s.cherevko@fz-juelich.de)

29 **Supplementary Note 1. Precipitation free MEA cell setup**

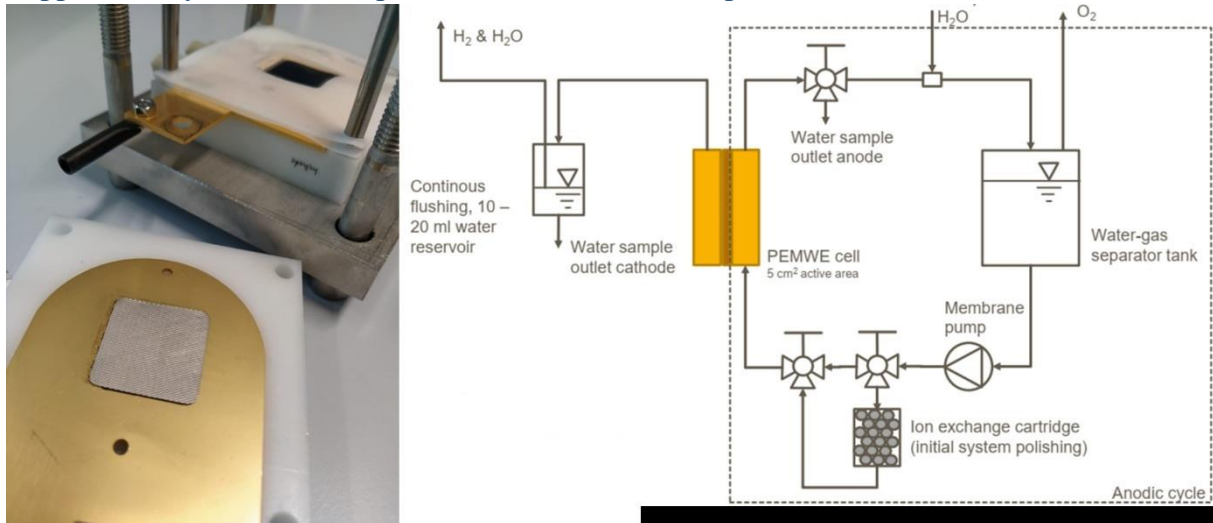

30  
 31 *Figure 1* a) Picture of the precipitation free MEA cell setup. The titanium flow fields are gold plated, the anode side porous  
 32 transport layer is a platinized expanded titanium sheet. The cell body is made from of a PTFE block. b) Flow scheme of the  
 33 precipitation free MEA cell setup. The setup is polished by shorting cell inlet and outlet and cycling the DI water through an  
 34 ion exchanger before connecting the cell. Samples are taken from the anode water cycle and the cathode outlet respectively.

35  
 36  
 37  
 38

39 **Supplementary Note 2. Calculation of dissolution rates and mass losses in MEA and H-cell**

40

41 **Water balance calculations MEA**

42 Experiments in MEA are carried out with refilling the volume taken as samples. Hence, mass loss  
 43 calculations and dissolution rates have to be calculated.

44 The water balance calculations for dissolution rates and totally dissolved iridium in the MEA cell  
 45 setup were carried out as follows.

46  $V_0$  Initial water volume in the anode cycle

47  $V_S$  Sample volume

48  $\left(\frac{dV_A}{dt}\right)_C$  Volume loss from anode to cathode through electroosmotic drag

49  $\left(\frac{dV_A}{dt}\right)_R$  Volume loss from anode side through consumption in the reaction

50  $c_m(t)_A$  Concentration measured at time  $t$  in the anode water cycle

51  $c_m(t)_C$  Concentration measured at time  $t$  at the cathode outlet

52  $c_c(t)_A$  Calculated concentration on the Anode side taking sample tapping and replacement into  
 53 account.

54 With continuous refill to keep the water level in the anode cycle constant the mass loss at time  $t_n$  there  
 55 the  $n^{\text{th}}$  sample is taken is given by

56 
$$m(t_n)_A = c_m(t_n)_A V_0 + c_c(t_{n-1})_A V_S$$

57 If no constant refill is used and the water level continuously drops by electroosmotic drag and the  
58 reaction, the mass loss through the anode side is calculated with

59 
$$m(t_n)_A = c_m(t_n)_A \left( V_0 - \left[ \left( \frac{dV}{dt} \right)_C + \left( \frac{dV}{dt} \right)_R \right] (t_n) \right) + c_c(t_{n-1})_A V_S$$

60 The iridium mass loss through the cathode side is calculated as follows.

61 
$$m(t_n)_C = \left( \frac{dV}{dt} \right)_C (t_n - t_{n-1}) c_m(t_n)_C$$

62

### 63 Water balance calculations H-cell

64 In the H-cell the water balance and mass loss calculations are performed as follows

65 The current in H-cell is  $0.56 \times 10^{-3}$  A

66 The mass loss through evolved O<sub>2</sub> in the reaction in 48 hours is

67 
$$m(\text{O}_2) = \frac{Mit}{zF} = 0.008 \text{ g}$$

68 Hence, the mass loss through the reaction is negligible.

69

70 With the variables

71  $V_0$  Initial water volume on each side

72  $V_S$  Sample volume

73  $c_m(t)$  Concentration measured at time in a respective compartment

74  $c_c(t)$  Concentration calculated for time t in the respective compartment

75 In an experiment with refill the iridium mass loss at the anode side the n<sup>th</sup> data point is given by

76 
$$m(t_n) = c_m(t_n)V_0 + c_c(t_{n-1})_A V_S$$

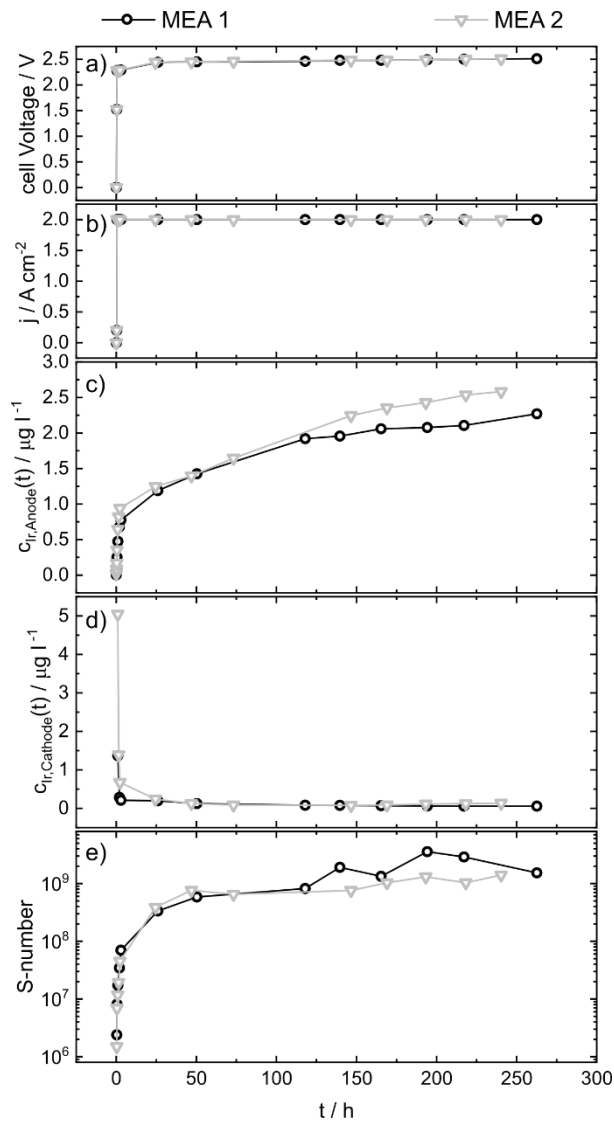

79

80 **Figure 2** Electrochemical and dissolution data of the precipitation free MEA. **a)** non-iR drop corrected cell potential. **b)**  
 81 applied current density. **c)** Iridium concentration in the anode water cycle. **d)** Iridium concentration on the cathode water  
 82 outlet. **e)** S-numbers. The method for calculating dissolution rates, and therefore S-numbers, is shown in supplementary note  
 83 5.

84 **Supplementary Note 4. Full SFC Protocol**

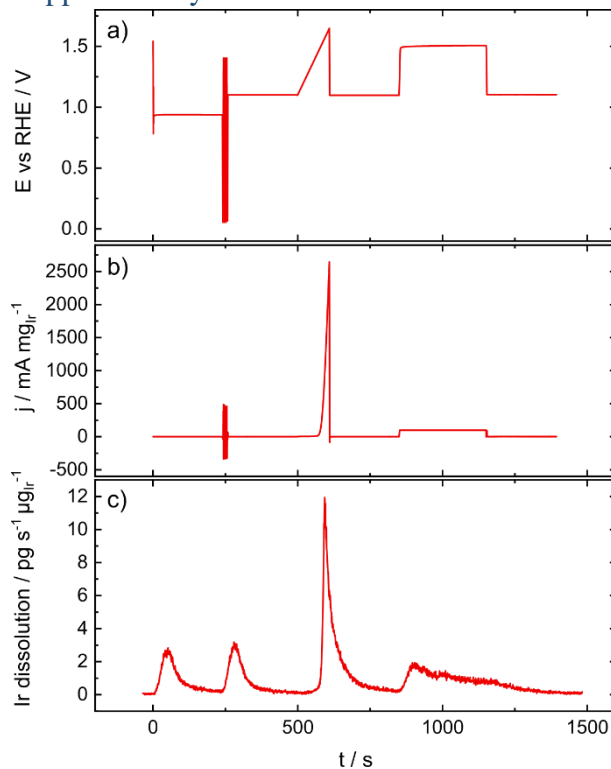

85

86 **Figure 3 Full protocol used for all SFC measurements in this study. a) applied potential b) resulting current c) resulting**  
87 **dissolution.**

88 The protocol used for all SFC measurements is composed of the following steps:

- 89 1. Contact during a 240 s hold at open circuit potential (OCP)
- 90 2. 3 fast cleaning CVs from 0.05 V<sub>RHE</sub> to 1.4 V<sub>RHE</sub> at a scan rate of 500 mV s<sup>-1</sup>
- 91 3. Hold at 1.1 V<sub>RHE</sub> for 240 s
- 92 4. Ramp from 1.1 V<sub>RHE</sub> to 1.65 V<sub>RHE</sub>. Scan rate: 5 mV s<sup>-1</sup>
- 93 5. Hold at 1.1 V<sub>RHE</sub> for 240 s
- 94 6. Galvanostatic hold at 100 mA mg<sub>Ir</sub><sup>-1</sup> for 300 s
- 95 7. Hold at 1.1 V<sub>RHE</sub> for 240 s

96 All S-numbers reported in this study for SFC-measurements are calculated from a 30 s time period at  
97 the end of the galvanostatic hold. For full description, we refer to the main text.

98

99

100

101

102

103

104

105

106

108 **Variation of loading**

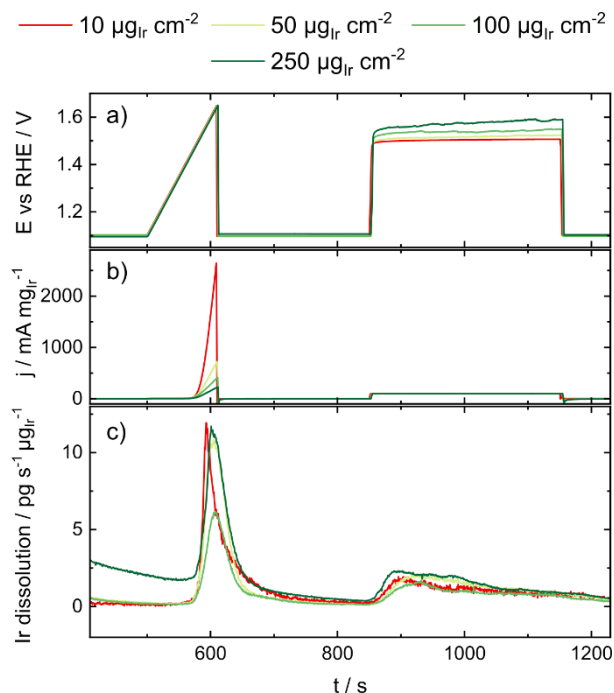

109  
 110 **Figure 4** Non  $iR$ -drop corrected electrochemical data and dissolution data with variation of catalyst loading in SFC-  
 111 ICP-MS. a) E vs RHE. b) gravimetric current density. c) resulting loading normalized dissolution. The dissolution curves at  
 112 the potential step are virtually equivalent.

113  
 114 **Variation of flow rate**

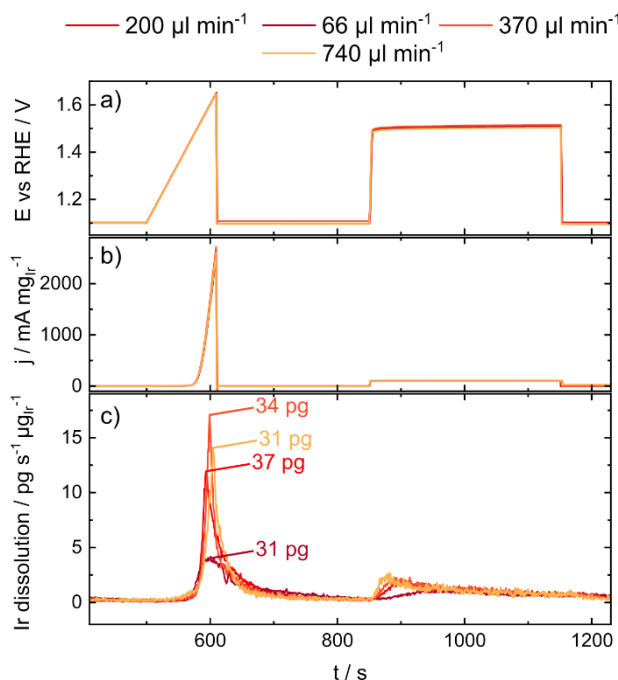

115  
 116 **Figure 5** Non  $iR$ -drop corrected electrochemical data and dissolution data with variation of electrolyte flow rate in  
 117 SFC-ICP-MS a) E vs RHE. b) gravimetric current density. c) resulting loading normalized dissolution. The dissolution  
 118 curves are different in shape due to different tailing properties at varied flow rates [1], but the dissolved amount of iridium is  
 119 equivalent.

120 As mass transport properties of dissolved catalyst species from the catalyst surface to the ICP-MS are  
121 changing with the flow rate of electrolyte through the cell, a different tailing behaviour is expected at  
122 different flow rates [1]. Hence, the dissolution profiles deviate especially at the beginning and the end  
123 of the current step. However, after reaching a quasi-steady state towards the end of the applied current  
124 pulse, the Ir dissolution rate for all four flow rates is virtually equivalent, along with the calculated S-  
125 numbers.

126

127

128

129

130

131

132

133

134

135

136

137

138

139

140

141

142

143

144

145

146

147

148

149

150

151

152

153

154

155 **Measurements with electrochemically dissolved iridium in the electrolyte**

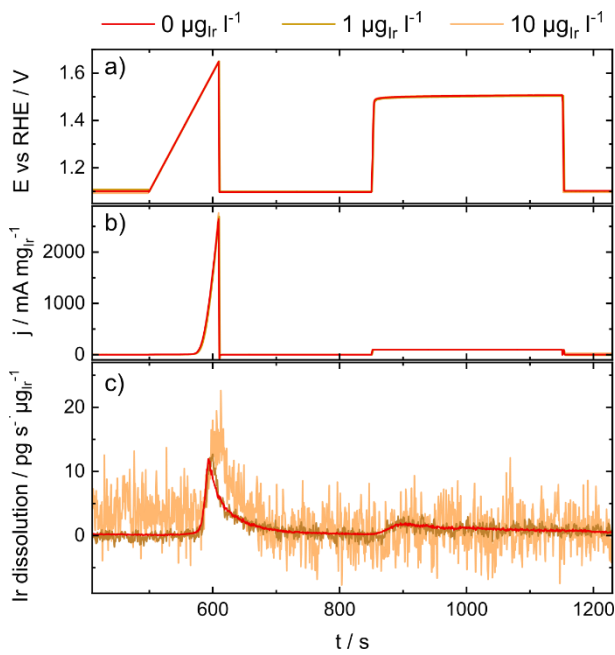

156  
157 **Figure 6** Non  $iR$ -drop corrected electrochemical data and dissolution data with varied amounts of electrochemically  
158 dissolved iridium in the electrolyte in SFC-ICP-MS. a)  $E$  vs RHE. b) gravimetric current density. c) resulting normalized  
159 dissolution. The dissolution curves with pre-dissolved iridium in the electrolyte, besides a worsened signal-to-noise ratio, are  
160 virtually equivalent to the baseline measurement.

161  
162 **Influence of Nafion content in the catalyst layer on dissolution**

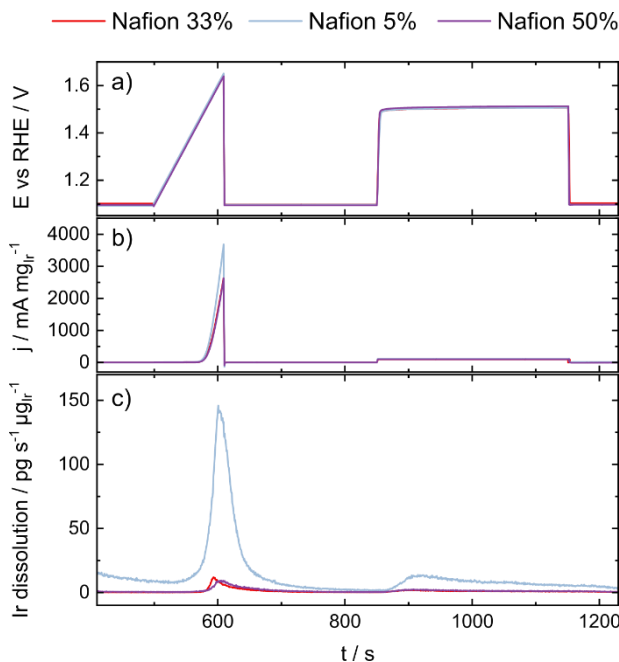

163  
164 **Figure 7** Non  $iR$ -drop corrected electrochemical data and dissolution data with variation of Nafion content in the  
165 catalyst layer in SFC-ICP-MS. a)  $E$  vs RHE. b) gravimetric current density. c) dissolution profiles of catalyst spots with  
166 different Nafion content. While catalyst spots with high Nafion content (33%, 50%) exhibit similar dissolution behavior,  
167 catalyst spots with low Nafion content dissolve much more at similar current densities.

168  
169



170 **Influence of pH differences on dissolution**

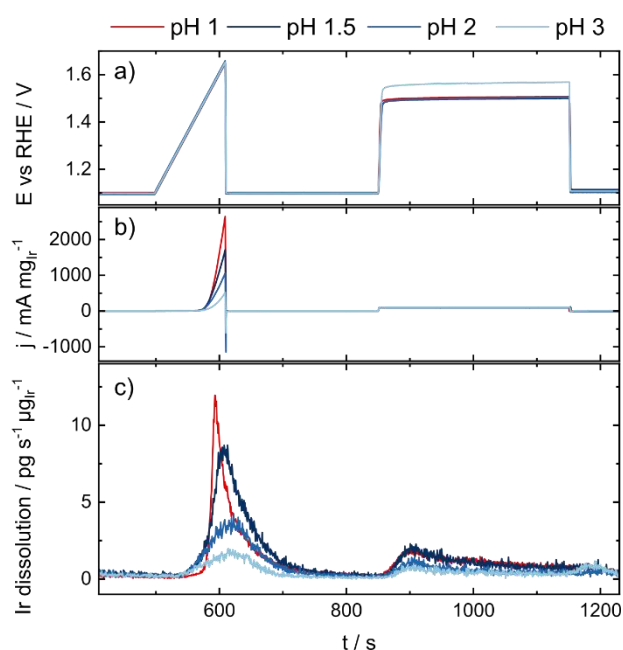

171  
 172 **Figure 8** Non iR-drop corrected electrochemical data and dissolution data with variation of pH in SFC-ICP-MS. a) E  
 173 vs RHE. b) gravimetric current density. c) dissolution data of catalyst spots, measured with electrolyte between pH 1 and pH  
 174 3. The dissolution during the galvanostatic step decreases in steadily with increasing pH.

175

176

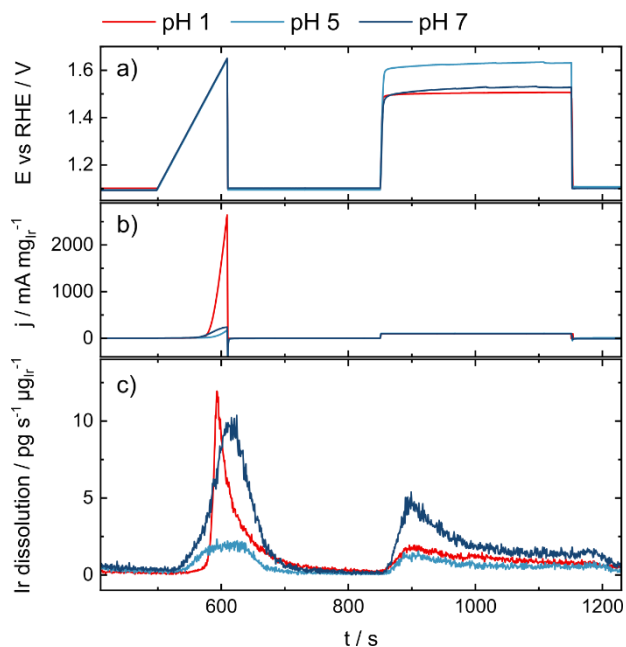

177  
 178 **Figure 9** Non iR-drop corrected electrochemical data and dissolution data with variation of pH in SFC-ICP-MS. a) E  
 179 vs RHE. b) gravimetric current density. c) dissolution data of catalyst spots, measured with electrolyte at pH 1, measured in  
 180 0.1 M H<sub>2</sub>SO<sub>4</sub> as well as pH 5 and pH 7 measured in 0.05 M phosphate buffer. The results do not show a clear trend. Due to  
 181 the different electrolytes employed, no clear conclusions can be drawn from the results.

182

183

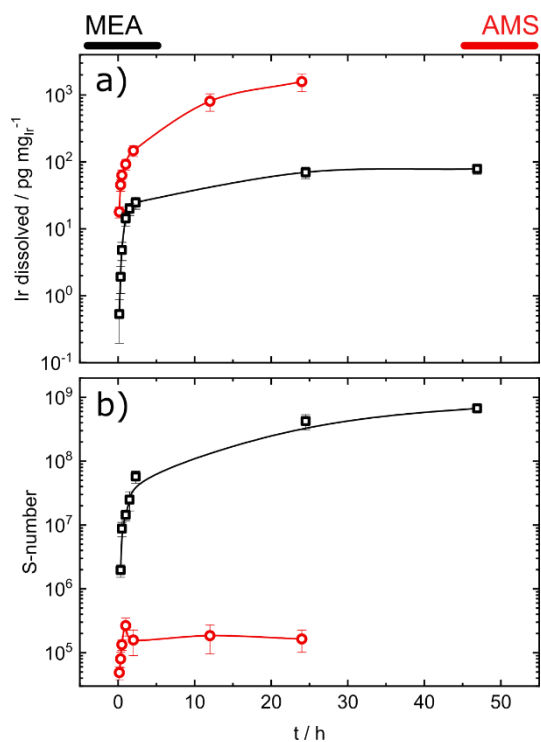

186  
187 **Figure 10** Long term stability of  $\text{IrO}_x$  in AES and MEA environment. a) Loading-normalized total dissolved iridium  
188 amount at current densities of  $0.2 \text{ A mgIr}^{-1}$  and  $2 \text{ A mgIr}^{-1}$  in AES and MEA respectively; b) S-numbers calculated from the  
189 amounts of dissolved iridium. Lines are there to guide the eye.

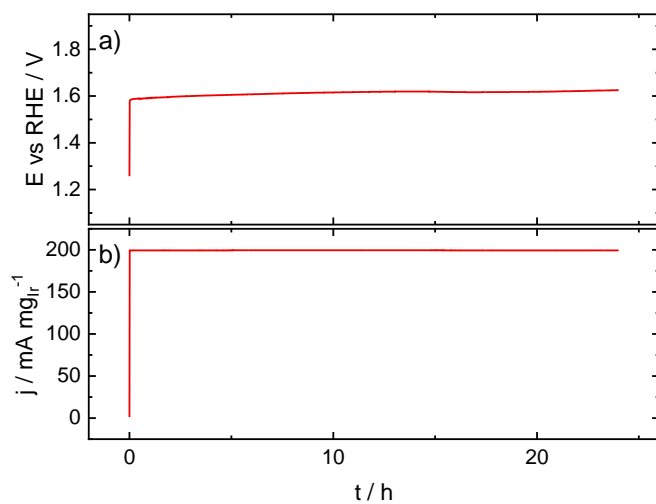

190  
191 **Figure 11** Exemplary electrochemical H-cell data in a 24 h measurement. a) Potential versus the reversible hydrogen  
192 electrode; b) gravimetric current densities.

193  
194  
195  
196  
197  
198

199 **Supplementary Note 7. STEM analysis of migration processes in MEA.**  
200 MEA with DI water in the water cycle, anode side

|           | <b>Spectrum 1</b> |                            | <b>Spectrum 2</b> |                            | <b>Spectrum 3</b> |                            |
|-----------|-------------------|----------------------------|-------------------|----------------------------|-------------------|----------------------------|
|           | <b>Wt%</b>        | <b><math>\sigma</math></b> | <b>Wt%</b>        | <b><math>\sigma</math></b> | <b>Wt%</b>        | <b><math>\sigma</math></b> |
| <b>Ir</b> | 52.6              | 1.1                        | 10.9              | 1.5                        | 1.9               | 0.7                        |
| <b>C</b>  | 25.2              | 0.9                        | 52.4              | 1.4                        | 55.0              | 1.0                        |
| <b>O</b>  | 13.5              | 0.6                        | 3.9               | 0.7                        | 1.0               | 0.5                        |
| <b>F</b>  | 8.7               | 0.5                        | 32.8              | 1.2                        | 42.1              | 0.9                        |

201

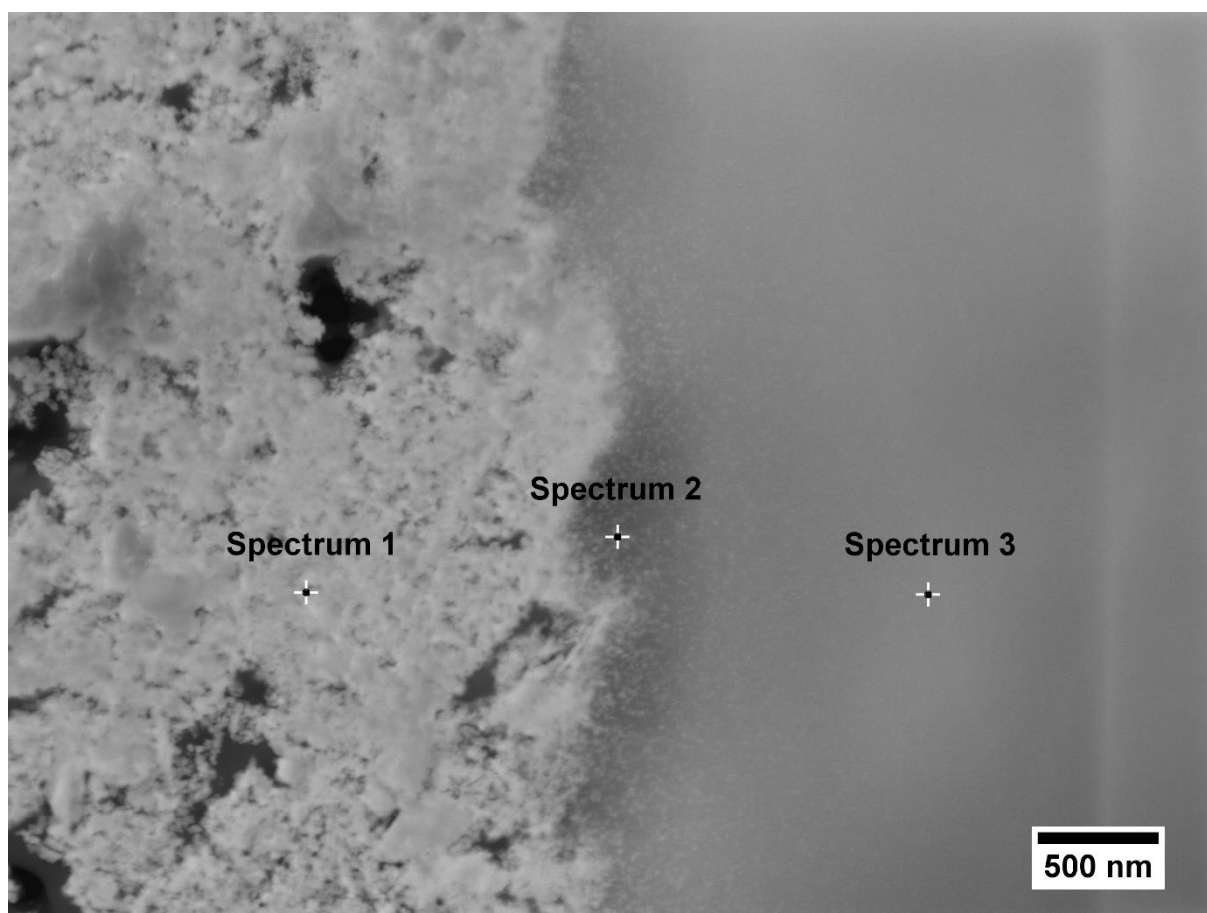

202

203 **Figure 12** STEM micrograph of the anode catalyst layer of an MEA operated for 48 h at 2 A cm<sup>-2</sup> with DI water circulating  
204 in the anode water cycle.

205

206

207

208

209

210

211

212

213

214

215 MEA with DI water in the water cycle, cathode side

|    | Spectrum 4 |          | Spectrum 5 |          | Spectrum 6 |          |
|----|------------|----------|------------|----------|------------|----------|
|    | Wt%        | $\sigma$ | Wt%        | $\sigma$ | Wt%        | $\sigma$ |
| C  | 47.1       | 1.2      | 51.0       | 1.0      | 67.1       | 0.9      |
| F  | 39.6       | 1.1      | 34.4       | 0.9      | 13.9       | 0.6      |
| O  | 12.5       | 0.9      | 12.7       | 0.8      | 11.5       | 0.7      |
| Ir | 0.8        | 1.5      | 1.8        | 1.3      | 0.0        | 1.1      |
| Pt | 0.0        | 0.4      | 0.0        | 0.5      | 7.5        | 0.5      |

216

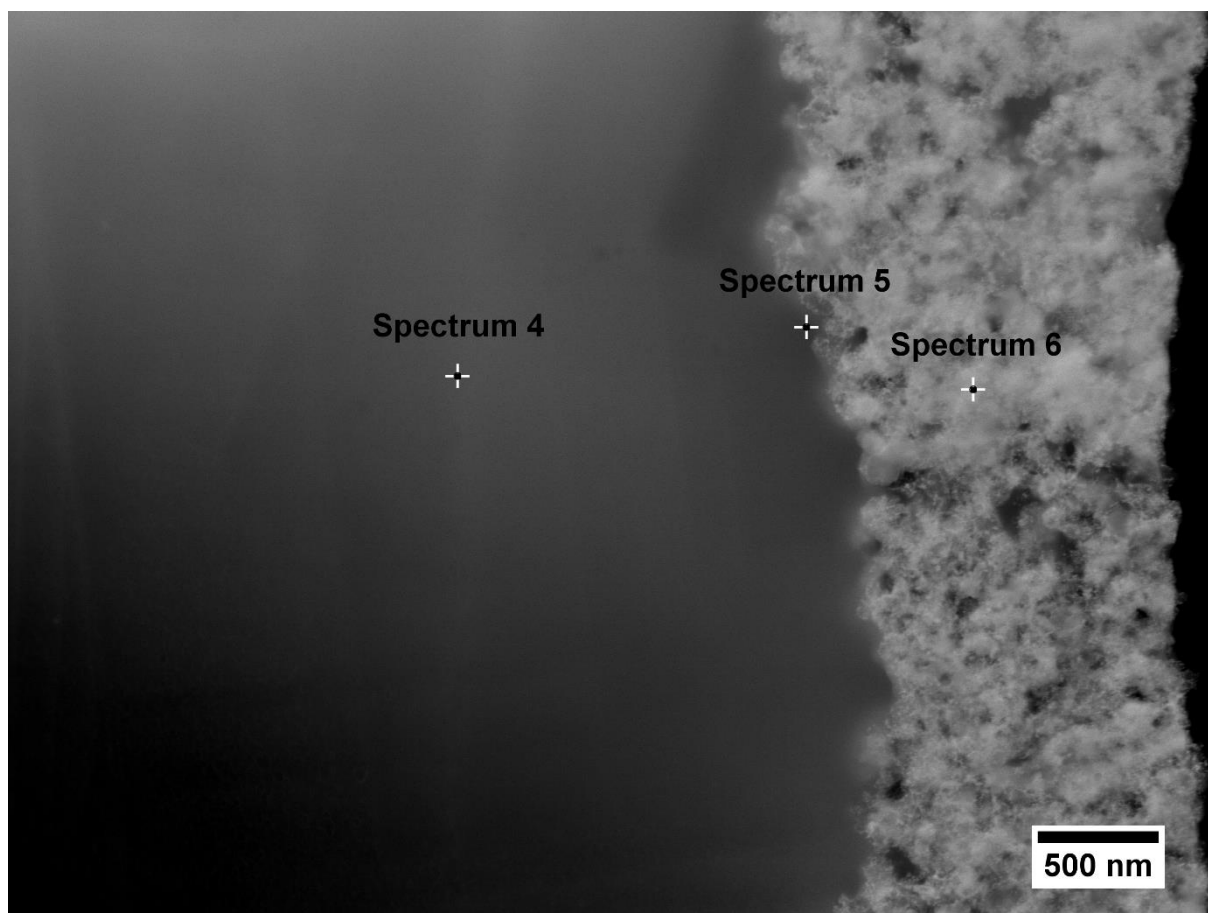

217

218 *Figure 13* STEM micrograph of the cathode catalyst layer of an MEA operated for 48 h at 2 A cm<sup>-2</sup> with DI water circulating  
219 in the anode water cycle.

220

221

222

223

224

225

226

227

228

229

230 MEA operated with diluted acid in the water cycle, anode side

|    | Spectrum 7 |          | Spectrum 8 |          | Spectrum 9 |          | Spectrum 10 |          |
|----|------------|----------|------------|----------|------------|----------|-------------|----------|
|    | Wt%        | $\sigma$ | Wt%        | $\sigma$ | Wt%        | $\sigma$ | Wt%         | $\sigma$ |
| Ir | 41.3       | 1.9      | 1.7        | 1.5      | 0.0        | 0.6      | 0.6         | 0.8      |
| C  | 31.3       | 1.5      | 63.8       | 2.3      | 29.9       | 0.5      | 60.03       | 1.3      |
| O  | 16.6       | 1.1      | 3.8        | 1.5      | 3.3        | 0.3      | 2.4         | 0.7      |
| Au | 8.1        | 1.6      | 0.0        | 0.9      | 58.1       | 0.5      | 9.0         | 0.8      |
| F  | 1.6        | 0.6      | 30.5       | 1.9      | 8.8        | 0.3      | 27.6        | 1.0      |
| Pt | 0.9        | 1.3      | 0.1        | 0.8      | 0.0        | 0.5      | 0.0         | 0.1      |
| Ti | 0.1        | 0.1      | 0.0        | 0.1      | 0.0        | 0.1      | 0.0         | 0.6      |

231

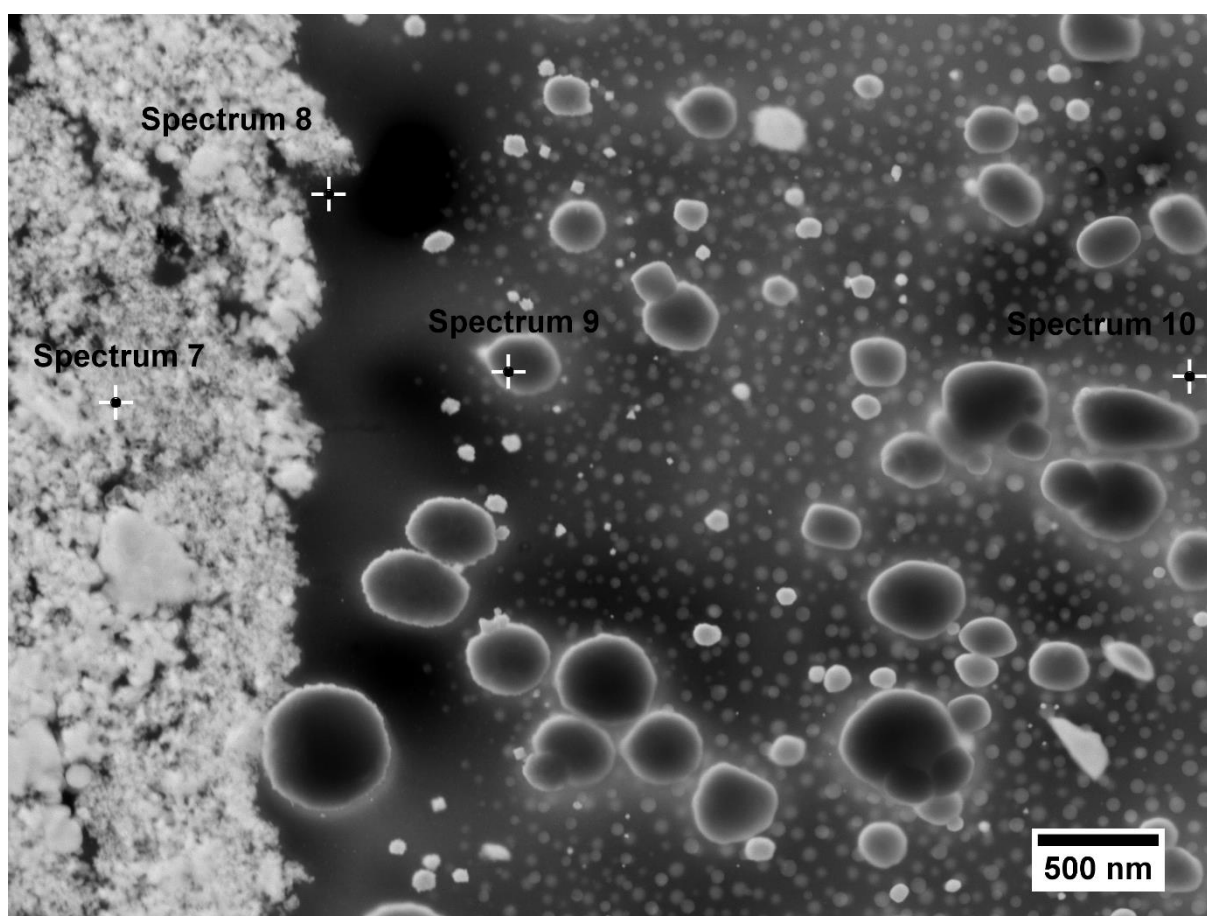

232

233 *Figure 14* STEM micrograph of the anode catalyst layer of an MEA operated for 48 h at 2 A cm<sup>-2</sup> with 0.1 M H<sub>2</sub>SO<sub>4</sub>  
234 circulating in the anode water cycle.

235

236

237

238

239

240

241  
242  
243  
244

MEA operated with diluted acid in the water cycle, cathode side

|    | Spectrum 11 |          | Spectrum 12 |          | Spectrum 13 |          | Spectrum 14 |          |
|----|-------------|----------|-------------|----------|-------------|----------|-------------|----------|
|    | Wt%         | $\sigma$ | Wt%         | $\sigma$ | Wt%         | $\sigma$ | Wt%         | $\sigma$ |
| C  | 54.6        | 2.0      | 45.1        | 1.5      | 15.3        | 1.1      | 55.7        | 1.2      |
| F  | 26.7        | 1.4      | 35.4        | 1.3      | 20.4        | 1.2      | 8.8         | 0.6      |
| Ir | 15.8        | 2.0      | 6.7         | 1.4      | 7.5         | 1.2      | 11.2        | 1.2      |
| O  | 1.6         | 1.0      | 7.3         | 1.1      | 39.2        | 1.3      | 9.2         | 0.8      |
| Au | 1.0         | 1.0      | 0.0         | 0.7      | 0.0         | 0.6      | 0.0         | 0.9      |
| Pt | 0.2         | 0.8      | 0.1         | 0.6      | 0.3         | 0.5      | 13.6        | 0.7      |
| Ti | 0.2         | 0.2      | 5.4         | 0.3      | 17.3        | 0.6      | 1.4         | 0.2      |

245  
246

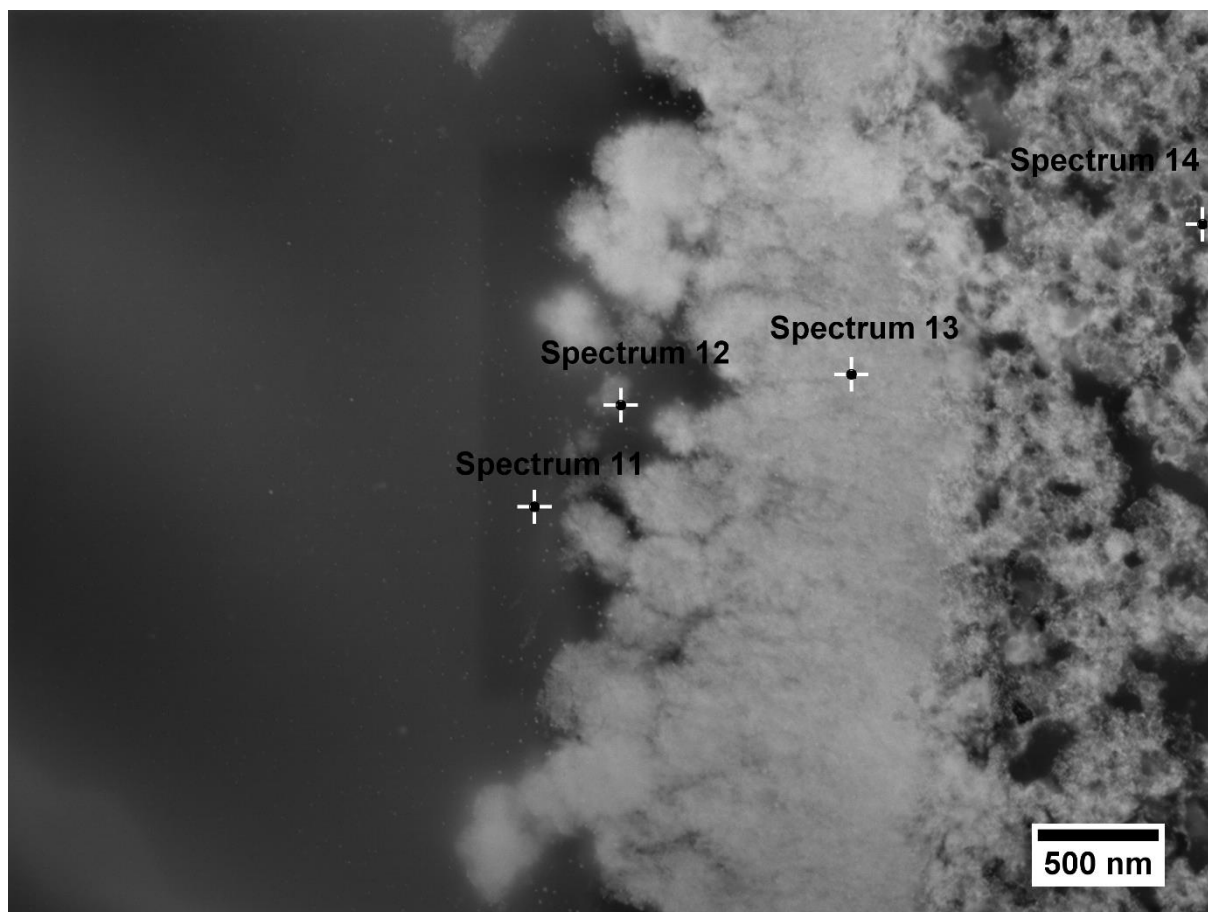

247  
248  
249  
250  
251  
252

Figure 15 STEM micrograph of the cathode catalyst layer of an MEA operated for 48 h at 2 A cm<sup>-2</sup> with 0.1 M H<sub>2</sub>SO<sub>4</sub> circulating in the anode water cycle.

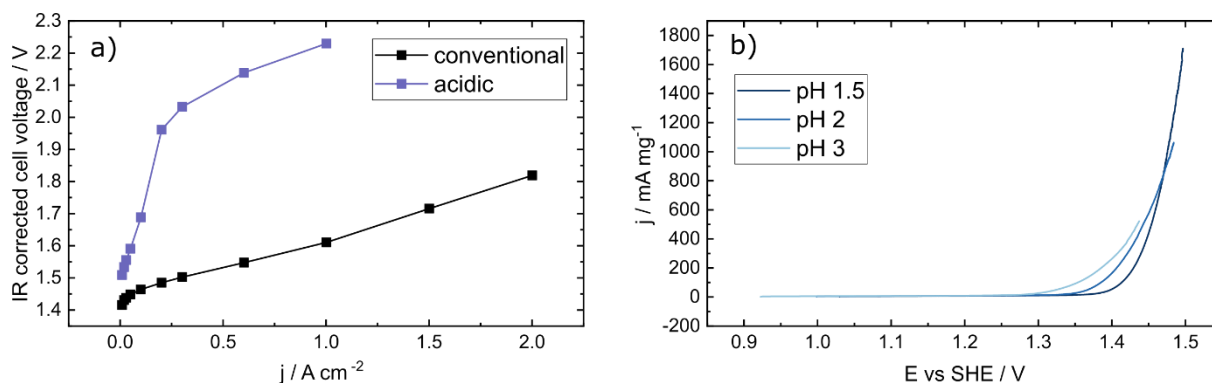

255  
 256 **Figure 16 Changes in activity due to a change in pH** a) iR-drop corrected end of life polarization curves in the  
 257 precipitation free MEA setup with anode catalyst loadings of  $1 \mu\text{g}_{\text{Ir}} \text{cm}^{-2}$  with DI water and  $0.1 \text{ M H}_2\text{SO}_4$  in the anode water  
 258 cycle b) iR-drop corrected ramps at a scan speed of  $5 \text{ mV s}^{-1}$  of iridium catalyst spots at different pH values.

259 According to the Nernstian equation, the onset potential of the OER shifts due to changes in pH with  
 260  $0.059 \text{ pH}$  towards lower potentials against the standard hydrogen electrode (SHE). As water supply at  
 261 the cathode side in the MEA system only takes place through electroosmotic flow (proportional to the  
 262 current density), the proton concentrations as well as the hydrogen pressure are constant at a given  
 263 current density, the cathode side can be treated as a standard hydrogen electrode. Hence, differences in  
 264 onset and operating potentials in the MEA system due to reactants of different pH can be accounted to  
 265 changes due to pH. In figure 12 a) polarization curves of MEAs with DI water and  $0.1 \text{ M H}_2\text{SO}_4$  as  
 266 reactants are displayed. Even at low current densities the potential of the acidic curve exceeds the  
 267 potential of the conventional system by more than  $100 \text{ mV}$ , indicating a pH shift of 2. At higher  
 268 potentials the gap increases, indicating either mass transport limitations or even higher pH differences.  
 269 These results show, that pH in the conventional system is higher than generally estimated in the OER  
 270 community.

271 Figure 12 b) shows iR-drop corrected UI-curves normalized to SHE potential, measured in SFC, as  
 272 comparison. As well as in the conventional system one sees the shift towards lower potentials.

273  
 274  
 275  
 276  
 277  
 278  
 279

280  
281  
282  
283

### Supplementary Note 9. Corrosion processes in MEA due to lowered pH.

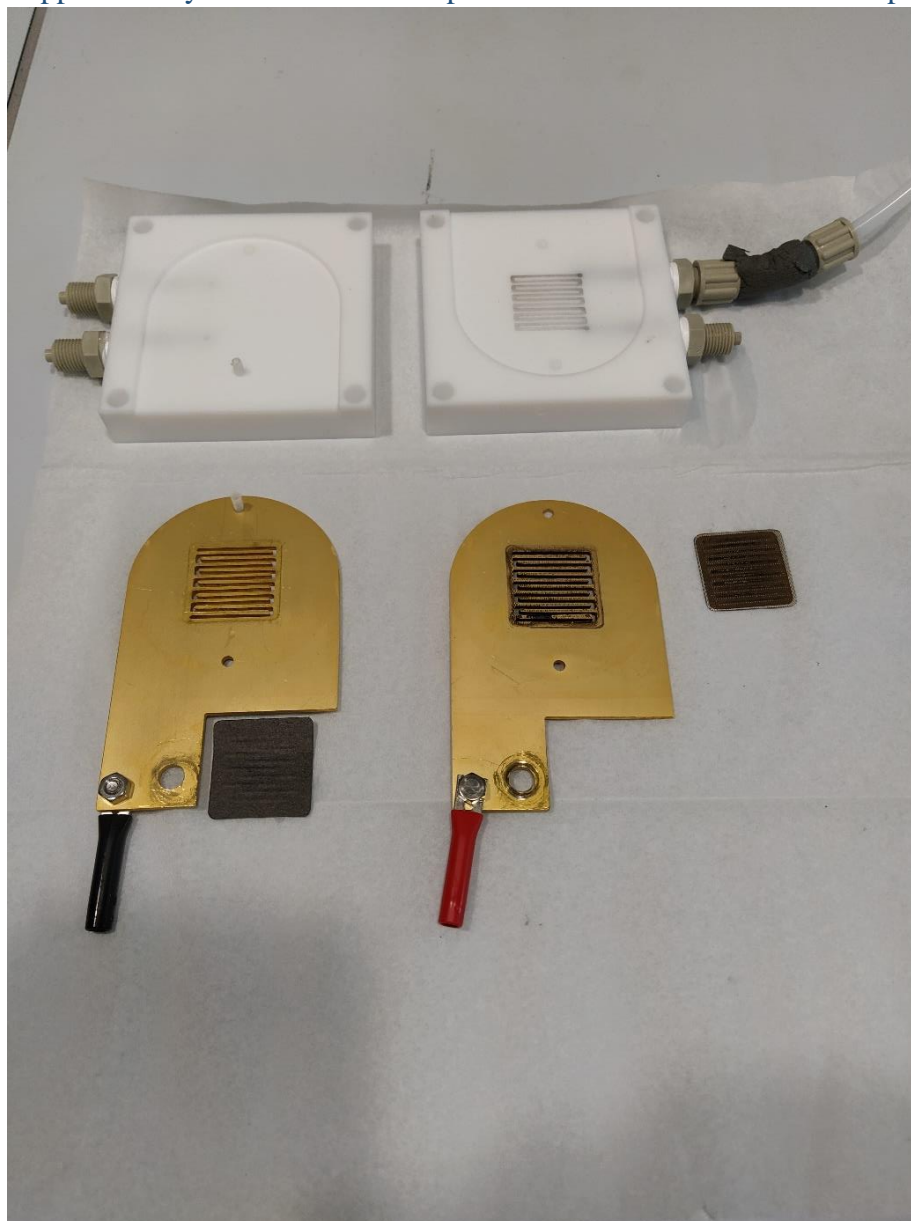

284  
285  
286  
287

**Figure 3** Flow fields and current collectors after 48 h of constant current measurement at  $2 \text{ A cm}^{-2}$ . The flow field from the cathode side (left) is virtually unchanged while flow field and porous transport layer from the anode (right) side are heavily corroded.

288 While the precipitation-free MEA cell setup is resistant to normal operation for several days to weeks  
289 without noticeable change, damages at the flow fields and current collectors are visible after 48h of  
290 continuous operation in  $0.1 \text{ M H}_2\text{SO}_4$ . The setup after the 48h test is shown in Figure 3. While the  
291 cathode side is visibly unaltered, corrosion damage at the anode side is clear.

292  
293  
294  
295



296

297 **References:**

- 298 • 1. Shkirskiy, V., et al., *On the Time Resolution of Electrochemical Scanning Flow Cell*  
299 *Coupled to Downstream Analysis*. Journal of The Electrochemical Society, 2019. **166**(16): p.  
300 H866-H870.

301
